# Supplementary material for: Initial assessment of potential carcinogenic constituents in the excretory and secretory products of Clonorchis sinensis
Source: Research Square preprint supplement (doi:10.21203/rs.3.rs-8328347/v1), 2025-12-18
Supplement: Supplementary file 1 [file 2e6df837da1d69a546f43055.docx]

| **Certificate of Analysis** | | | | | | | | |
| --- | --- | --- | --- | --- | --- | --- | --- | --- |
| **Gene Name** | CTSB | | | | **Order No.** | Y0038593-1 | | |
| **Lot No.** | K7508/Y0038593-1 | | | | **Cloning Vector** | pET-28a+ | | |
| **Cloning Sites** | NcoI-XhoI | | | | **Insert Size** | 968 | | |
| **QC Results** | | | | | | | | |
| **Test Items** | | **Specifications** | | | | | | **Results** |
| **Insert Sequence** | | Insert sequence results consistent with target | | | | | | Pass |
| **Vector Sequence** | | Flanking sequence consistent with expected | | | | | | N/A |
| **ORF Across Junction** | | Correct and consistent with target | | | | | | N/A |
| **Restriction Digest** | | Expected fragment sizes observed | | | | | | Pass |
| **PCR Amplification** | | Correct without non - specific bands | | | | | | N/A |
| **DNA Quantity/Quality** | | Actual yield (by A 260 ) | | | | | | 4ugug |
| Concentration (n/a if lyophilized) | | | | | | N/A |
| Purity (A 260/A280 = 1.8 - 2.0) | | | | | | Pass |
| # of Tubes | | | | | | 2 |
| Matrix | | | | | | ddH2O |
| **Endotoxin Test** | | Verified, <0.1 EU/µg (Endo-Free Preps Only) | | | | | | N/A |
| **Appearance** | | Clear, no visible particles | | | | | | Pass |
| **Label** | | Correct and white | | | | | | Pass |
| **Comments** | | NA | | | | | | |
| **Restriction Digestion Map** | | | | | | | | |
| 1 2 M | | | | | | | | |
| 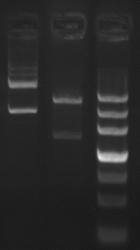 | | | **Lane1**: plasmid DNA  **Lane2**: Digested with  MluI/XhoI  **Lane M**: DNA Marker | | | | 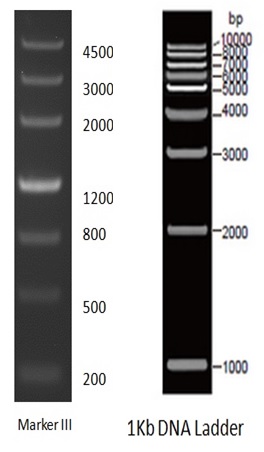 | |
| **Certified by: LIUTAO** | | | | **Date:**2020-11-11 | | | | |

| **Plasmid Map and Gene Sequence** | |
| --- | --- |
| **Gene Name：**CTSB | |
| **Order No：**Y0038593-1 | **Date：**2020-11-11 |
| **Vector Name：**pET-28a+ | **Clone site：**NcoI-XhoI |
| The gene CTSB  has been cloned intopET-28a+  by NcoI-XhoI | |
| **Plasmid Map** | |


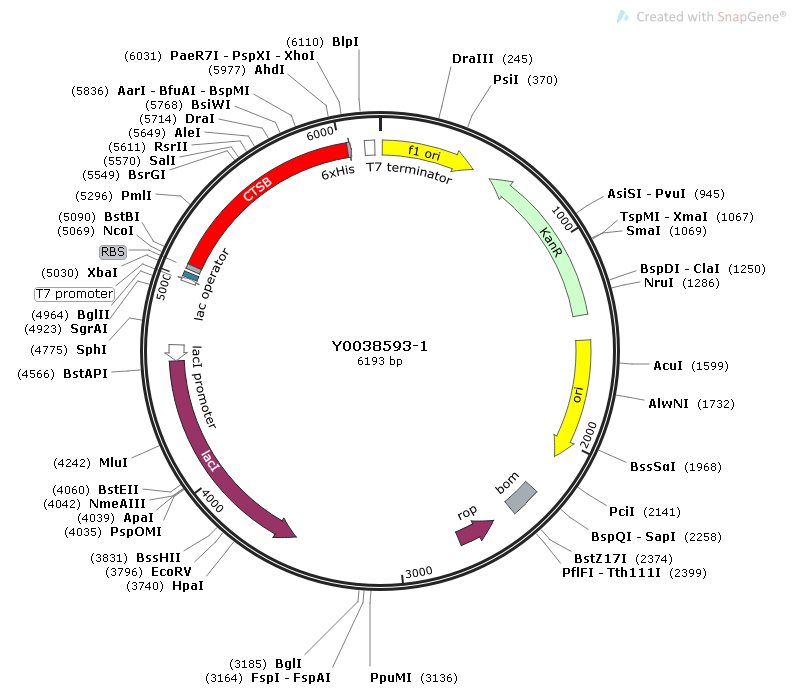


**Gene Sequence：**

CCATGGAGTATATTCCATCTTTCGAATCGCTTTCGGATGAAATTGTCCATTACATCAACCATAAGGCTAATACCACCTGGAAGGCAGCGAAATACCAGCGTTTCAAAACAATATCTGATGTGCGCCGTGTGCTTGGAGCTGTTCCCGACCCAAACGGATTCGGCCTGGAAAAACGTTGTTTGCTATCCACCATACGAGAACAAGAACTACCAGAATCTTTTGATGCACGTGAGAAGTGGCCGTATTGCAGTTCAATAGCAGAAATTCGTGATCAGTCAAACTGCGGATCGTGTTGGGCTTTCGGAGCTGCGGGAGCTATTTCTGATCGTATTTGCATCGCATCCGGGGGAAAACATCAGCCCCGCATTAGTCCAGAAGACTTAGTTGATTGCTGTGCTGATTGCGGCATGGGTTGTCAAGGTGGCTATCCCGCACAAGCATGGGAATACTGGGTCCGAAATGGATTAGTGACTGGTGATTTGTACAATACCACGGACACCTGTCGACCTTACTCTTTCCCTCCATGCGAACATCATGTTGTCGGTCCGCGAAAACCTTGCACCGGAGATCCTACAACACCCCAGTGTGTGAAAAAGTGTCAGCCAGAATACCCGAAGACATACGAAAATGACAAGTGGTACGGTTTAAAGGCGTACAGCATTCATTCTGACCAGGAGGCAATCATGCGTGACCTAATGACGTACGGACCACTGGAAGTTGACTTTGAGGTGTACGCTGACTTCCCGAGCTATTCAAGTGGAGTGTATAGGCATGTGGCAGGTGGACTTCTGGGCGGTCATGCGGTTCGGTTGGTTGGCTGGGGAGTTGAGGACGGTGCAGACTATTGGCTGATTGCTAATTCGTGGAACACTGACTGGGGTGATGGTGGTTATTTCAAGATTAGACGAGGTGTCAACGAATGTGGTATTGAGAGTGACGCCAATGCTGGTCATCCAAAACTGCTCGAG
